# Supplementary material for: Accurate machine learning-based germination detection, prediction and quality assessment of three grain crops
Source: PubMed Central journal article supplement (PMC7754596; doi:10.1186/s13007-020-00699-x), 2020-12-22
Supplement: 13007_2020_699_MOESM1_ESM.pdf [file 13007_2020_699_MOESM1_ESM.pdf]

## Accurate Machine Learning–Based Germination Detection, Prediction and Quality Assessment of Three Grain Crops

Nikita Genze<sup>1,2</sup>, Richa Bharti<sup>1,2</sup>, Michael Grieb<sup>4</sup>, Sebastian J. Schultheiss<sup>5</sup>, Dominik G. Grimm<sup>1,2,3,\*</sup>

<sup>1</sup> Technical University of Munich, TUM Campus Straubing for Biotechnology and Sustainability, Bioinformatics, Schulgasse 22, 94315 Straubing, Germany

<sup>2</sup> Weihenstephan-Triesdorf University of Applied Sciences, Petersgasse 18, 94315 Straubing, Germany

<sup>3</sup> Technical University of Munich, Department of Informatics, Boltzmannstr. 3, 85748 Garching, Germany

<sup>4</sup> Technology and Support Centre in the Centre of Excellence for Renewable Resources (TFZ), Schulgasse 20, 94315 Straubing, Germany

<sup>5</sup> Computomics GmbH, Eisenbahnstr. 1, 72072 Tübingen, Germany

\* Correspondence: [dominik.grimm@hswt.de](mailto:dominik.grimm@hswt.de)

## Supplementary Information

### *Secale cereale*

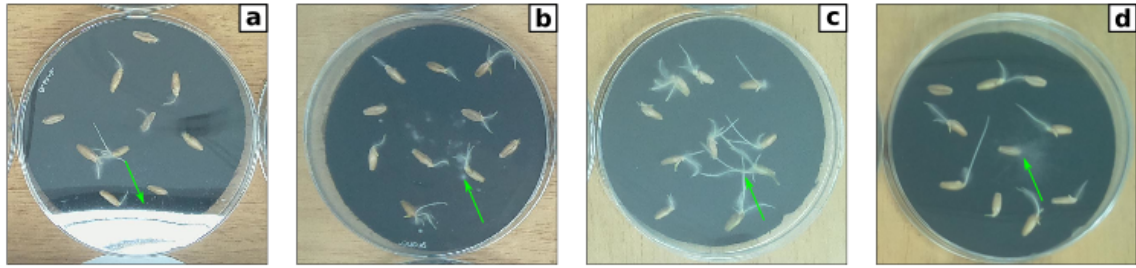

### *Pennisetum glaucum*

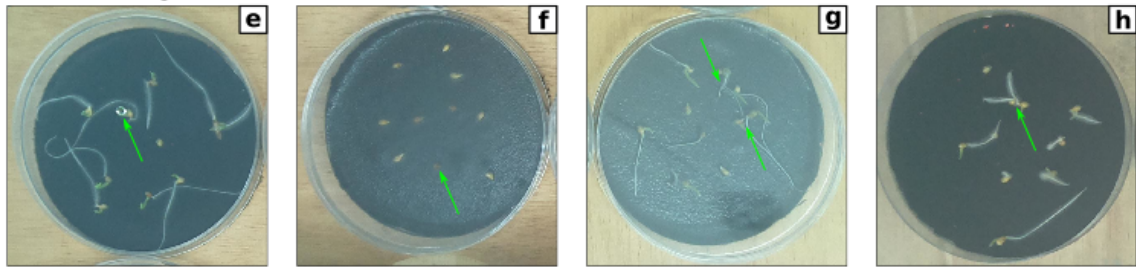

### *Zea mays*

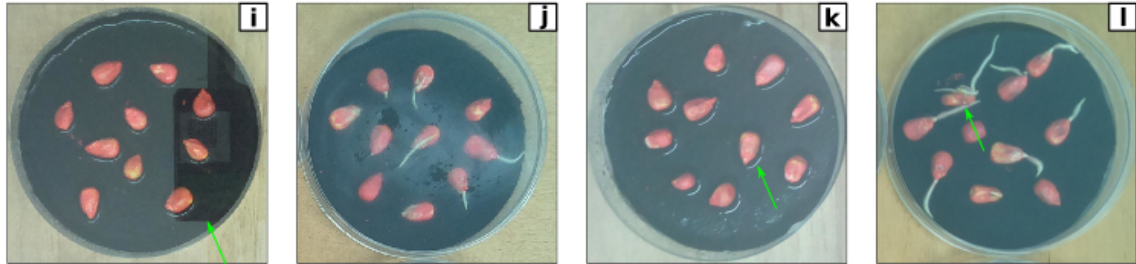

**Supplementary Figure S1 Different issues while image acquisition process.** Important parts are indicated by green arrows  
**a** Light source is reflected on the lid **b** Mold growing inside the lid **c** Radicles of multiple seeds intersecting each other **d** Irregular germination, which doesn't result in a clear radicle **e** Water drop on the lid after radicle touches it **f** Poorly visible seed due to condensation on the lid **g** Intersection of different radicles **h** Different seeds too close to each other **i** Reflection of the camera module in images **j** Condensation inside petri dishes **k** Reflections of water around seeds (at the beginning of the germination experiment) **l** Radicle of one seed touches the coat of another seed

**Supplementary Table S1 Additional statistics of the dataset for *Secale cereale*.**

|       | # time series  | # images | # non-germinated | # germinated | ratio non-germinated |
|-------|----------------|----------|------------------|--------------|----------------------|
| train | 64 (640 seeds) | 6080     | 28581            | 32219        | 0.47                 |
| eval  | 8 (81 seeds)   | 760      | 3800             | 3897         | 0.494                |
| test  | 9 (90 seeds)   | 855      | 4303             | 4247         | 0.503                |
| sum   | 81 (811 seeds) | 7695     | 36684            | 40363        | -                    |

**Supplementary Table S2 Additional statistics of the dataset for *Pennisetum glaucum*.**

|       | # time series  | # images | # non-germinated | # germinated | ratio non-germinated |
|-------|----------------|----------|------------------|--------------|----------------------|
| train | 65 (654 seeds) | 6305     | 24883            | 38555        | 0.392                |
| eval  | 8 (80 seeds)   | 776      | 3195             | 4565         | 0.412                |
| test  | 9 (90 seeds)   | 873      | 3640             | 5090         | 0.417                |
| sum   | 82 (824 seeds) | 7954     | 31718            | 48210        | -                    |

**Supplementary Table S3 Additional statistics of the dataset for *Zea mays*.**

|       | # time series  | # images | # non-germinated | # germinated | ratio non-germinated |
|-------|----------------|----------|------------------|--------------|----------------------|
| train | 67 (651 seeds) | 6499     | 46216            | 16931        | 0.732                |
| eval  | 8 (73 seeds)   | 776      | 4818             | 2263         | 0.68                 |
| test  | 9 (90 seeds)   | 873      | 5957             | 2773         | 0.682                |
| sum   | 84 (814 seeds) | 8148     | 56995            | 21963        | -                    |

**Supplementary Table S4 Different hyperparameter pairs that were used while training.** The hyperparameter set (HS) is a short reference in following results. The learning rate (lr) is used by gradient descent, the dropout-keep-probability (dkp) is the parameter used in Tensorflow's object detection api and is calculated as  $dkp = 1 - \text{dropout rate}$ .

|     | HS1    | HS2    | HS3    | HS4    | HS5    | HS6    | HS7    | HS8    | HS9    | HS10   | HS11   | HS12   |
|-----|--------|--------|--------|--------|--------|--------|--------|--------|--------|--------|--------|--------|
| lr  | 3.6e-3 | 2.9e-3 | 1.2e-3 | 2.1e-4 | 6.5e-5 | 2.9e-5 | 5.3e-6 | 2.3e-6 | 9.9e-7 | 7.3e-7 | 5.4e-7 | 4.5e-7 |
| dkp | 0.51   | 0.687  | 0.529  | 0.801  | 0.866  | 0.652  | 0.646  | 0.716  | 0.916  | 0.591  | 0.578  | 0.806  |

**Supplementary Table S5 Results of model evaluation for *Pennisetum glaucum*.**

|          | ResNet50 |               |             | ResNet101 |               |              | Inception v2 |               |              | IncResNet v2 |               |              |
|----------|----------|---------------|-------------|-----------|---------------|--------------|--------------|---------------|--------------|--------------|---------------|--------------|
| HS       | Step [k] | loss          | mAP [%]     | Step [k]  | loss          | mAP [%]      | Step [k]     | loss          | mAP [%]      | Step [k]     | loss          | mAP [%]      |
| 1        | 2        | 0.7113        | 0           | 26        | 0.7489        | 0            | 9            | 0.6705        | 0            | -            | -             | -            |
| 2        | 42       | 0.8094        | 0           | -         | -             | -            | 7            | 0.6281        | 0            | 4            | 0.6389        | 0            |
| 3        | 15       | 0.9203        | 84.17       | 34        | 0.5059        | 0            | 5 (7)        | 0.6808        | 85.1 (85.52) | 3            | 0.9338        | 85.11        |
| 4        | 4        | 0.6472        | 85.25       | 5         | 0.591         | 84.49        | 3            | 0.5996        | 84.72        | <b>6</b>     | <b>0.5513</b> | <b>88.91</b> |
| 5        | 3        | 0.5832        | 83.86       | 6         | 0.4951        | 84.29        | 5            | 0.6223        | 85.64        | 47           | 0.7524        | 88.78        |
| <b>6</b> | <b>7</b> | <b>0.6379</b> | <b>85.8</b> | <b>30</b> | <b>0.6068</b> | <b>87.62</b> | 3            | 0.6876        | 85.01        | 14           | 0.6614        | 87.37        |
| 7        | 4        | 0.7746        | 83.25       | 4         | 0.8919        | 82.78        | <b>11</b>    | <b>0.9271</b> | <b>86.16</b> | 14           | 0.7816        | 85.23        |
| 8        | 14       | 0.9115        | 83.65       | 5         | 0.8158        | 82.72        | 13           | 0.9606        | 82.82        | 12           | 0.809         | 86.04        |
| 9        | 10       | 0.825         | 83.97       | 12        | 0.9518        | 83.31        | 33           | 0.7759        | 84.77        | 1            | 0.6806        | 58.79        |
| 10       | 14       | 0.7812        | 84.22       | 16        | 0.7929        | 81.91        | 50           | 0.7333        | 84.28        | 1            | 0.5781        | 4            |
| 11       | 37       | 0.7531        | 84.25       | 18        | 0.7828        | 82.93        | 50           | 0.828         | 83.61        | 1            | 0.6939        | 0            |
| 12       | 24       | 1.09          | 83.97       | 37        | 0.8376        | 82.08        | 50           | 0.9884        | 83.42        | 1            | 0.6248        | 0            |

**Supplementary Table S6 Results of model evaluation for *Secale cereale*.**

|    | ResNet50 |               |              | ResNet101     |               |                     | Inception v2 |               |              | IncResNet v2 |              |              |
|----|----------|---------------|--------------|---------------|---------------|---------------------|--------------|---------------|--------------|--------------|--------------|--------------|
| HS | Step [k] | loss          | mAP [%]      | Step [k]      | loss          | mAP [%]             | step         | loss          | mAP          | Step [k]     | loss         | mAP [%]      |
| 1  | 48       | 0.4966        | 74.80        | -             | -             | -                   | 5            | 0.4649        | 0            | -            | -            | -            |
| 2  | 39       | 0.7404        | 0            | -             | -             | -                   | 7            | 0.6691        | 0            | -            | -            | -            |
| 3  | 9        | 0.6046        | 80.27        | 11            | 0.4369        | 0                   | 9            | 0.2848        | 84.87        | 5            | 0.5216       | 86.78        |
| 4  | <b>4</b> | <b>0.5124</b> | <b>89.99</b> | 8             | 0.4019        | 90.05               | 5            | 0.4071        | 88.36        | 7            | 0.4793       | 91.61        |
| 5  | 6        | 0.3007        | 88.88        | <b>9 (10)</b> | <b>0.3054</b> | <b>91.58 (90.8)</b> | <b>9</b>     | <b>0.3448</b> | <b>90.07</b> | <b>21</b>    | <b>0.437</b> | <b>92.67</b> |
| 6  | 7        | 0.4335        | 88.53        | 9             | 0.4463        | 90.84               | 23           | 0.5838        | 88.15        | 8            | 0.3728       | 91.86        |
| 7  | 3        | 0.6217        | 87.43        | 15            | 0.4957        | 88.84               | 7            | 0.6704        | 86.03        | 17           | 0.5997       | 90.02        |
| 8  | 6        | 0.7103        | 86.67        | 13            | 0.5551        | 84.76               | 9            | 0.552         | 85.55        | 21           | 0.4061       | 88.81        |
| 9  | 12       | 0.6099        | 86.52        | 10            | 0.6258        | 84.75               | 31           | 0.6346        | 87.04        | 46           | 0.4337       | 88.34        |
| 10 | 13       | 0.5496        | 87.08        | 11            | 0.7298        | 86.01               | 31           | 0.5201        | 85           | 45           | 0.4642       | 87.92        |
| 11 | 32       | 0.514         | 87.02        | 15            | 0.5993        | 85.42               | 50           | 0.6086        | 85.33        | 46           | 0.4648       | 91.2         |
| 12 | 25       | 0.431         | 89.74        | 13            | 0.6718        | 87.79               | 50           | 0.5352        | 84.73        | 41           | 0.5397       | 87.1         |

**Supplementary Table S7 Results of model evaluation for *Zea mays*.**

|    | ResNet50  |               |              | ResNet101 |               |              | Inception v2 |               |              | IncResNet v2 |               |              |
|----|-----------|---------------|--------------|-----------|---------------|--------------|--------------|---------------|--------------|--------------|---------------|--------------|
| HS | Step [k]  | loss          | mAP [%]      | Step [k]  | loss          | mAP [%]      | Step [k]     | loss          | mAP          | Step [k]     | loss          | mAP [%]      |
| 1  | 15        | 0.7848        | 0            | -         | -             | -            | 13           | 0.5445        | 0            | -            | -             | -            |
| 2  | 35        | 0.8653        | 0            | -         | -             | -            | 21           | 0.7348        | 0            | 35           | 0.8071        | 0            |
| 3  | 17        | 0.4846        | 93.73        | 15        | 0.4390        | 93.65        | 13           | 0.374         | 95.69        | 11           | 0.3938        | 96.52        |
| 4  | 12        | 0.4770        | 95.21        | 3         | 0.4451        | 95.43        | 47           | 0.3534        | 95.48        | 8            | 0.3987        | 96.86        |
| 5  | 8         | 0.3914        | 96.08        | 11        | 0.3077        | 96.47        | <b>5</b>     | <b>0.4286</b> | <b>95.81</b> | <b>9</b>     | <b>0.3728</b> | <b>97.48</b> |
| 6  | <b>12</b> | <b>0.3670</b> | <b>96.21</b> | <b>13</b> | <b>0.2542</b> | <b>96.54</b> | 45           | 0.5039        | 95.32        | 6            | 0.3514        | 96.79        |
| 7  | 7         | 0.4511        | 93.66        | 9         | 0.4542        | 94.02        | 7            | 0.4634        | 92.58        | 12           | 0.4216        | 95.79        |
| 8  | 6         | 0.4331        | 91.24        | 5         | 0.5281        | 92.42        | 11           | 0.4839        | 92.94        | 20           | 0.5844        | 94.69        |
| 9  | 11        | 0.3956        | 90.89        | 8         | 0.5036        | 92.37        | 21           | 0.5279        | 91.91        | 25           | 0.4849        | 94.70        |
| 10 | 20        | 0.5159        | 91.45        | 11        | 0.5272        | 90.85        | 33           | 0.4946        | 93.50        | 26           | 0.4883        | 93.13        |
| 11 | 24        | 0.5346        | 90.62        | 10        | 0.5160        | 90.34        | 43           | 0.4563        | 92.39        | 47           | 0.4920        | 93.55        |
| 12 | 27        | 0.4552        | 91.12        | 15        | 0.6183        | 91.21        | 47           | 0.4217        | 93.24        | 34           | 0.4865        | 95.15        |

**a *Secale cereale***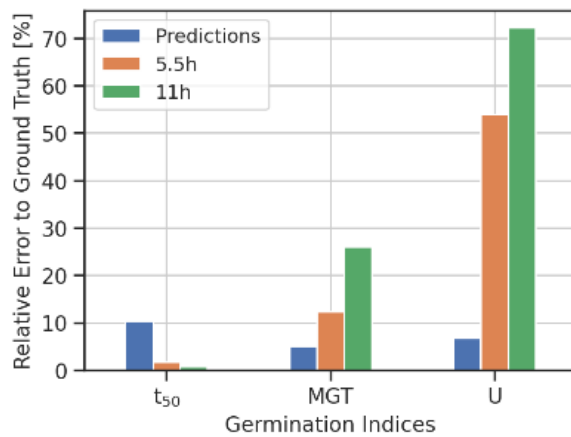**b *Pennisetum glaucum***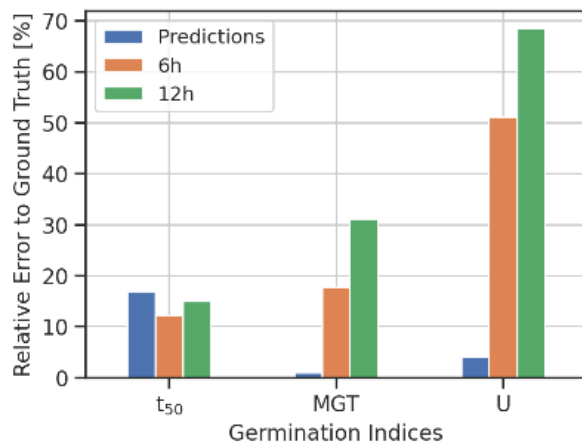

**Supplementary Figure S2 Relative error compared to the ground truth.** The comparison cannot be done for 22h/24h intervals, as  $t_{50}$  cannot be computed. Prediction based calculation is closer to ground truth for MGT and U a 60 seeds of *Secale cereale*. Intervals are measured in 5.5h and 11h intervals, as the experiment was stopped before 48h b 30 seeds of *Pennisetum glaucum* were compared

**Supplementary Table S8 Detailed summary of germination indices for *Zea mays*.** The value with the lowest error compared to the ground truth is shown in bold

|                                            | Predictions     | Ground Truth | M6              | M12             | M24             |
|--------------------------------------------|-----------------|--------------|-----------------|-----------------|-----------------|
| Final Germination Percentage g [1]         | 76.5            | 77.8         | <b>77.8</b>     | <b>77.8</b>     | <b>77.8</b>     |
| Medium Germination Time t50 (Coolbear) [2] | 3.15E+01        | 2.83E+01     | <b>2.84E+01</b> | 2.89E+01        | 3.24E+01        |
| Mean Germination Time MGT [3–6]            | <b>3.07E+01</b> | 2.87E+01     | 3.15E+01        | 3.43E+01        | 4.22E+01        |
| Germination Uncertainty U [6–8]            | <b>4.96E+00</b> | 5.20E+00     | 2.25E+00        | 1.34E+00        | 8.00E-01        |
| Medium Germination Time t50 (Farooq) [9]   | 3.15E+01        | 2.80E+01     | <b>2.83E+01</b> | 2.88E+01        | 3.22E+01        |
| VarGermTime [10]                           | 5.17E+01        | 5.00E+01     | <b>5.05E+01</b> | 5.55E+01        | 1.07E+02        |
| SEGermTime [10]                            | 8.72E-01        | 8.45E-01     | <b>8.50E-01</b> | 8.90E-01        | 1.24E+00        |
| CVGermTime [10,11]                         | 2.34E-01        | 2.46E-01     | 2.26E-01        | 2.17E-01        | <b>2.46E-01</b> |
| MeanGermRate [8,10]                        | <b>3.25E-02</b> | 3.49E-02     | 3.18E-02        | 2.92E-02        | 2.37E-02        |
| VarGermRate [6,10]                         | <b>5.79E-05</b> | 7.38E-05     | 5.16E-05        | 4.01E-05        | 3.40E-05        |
| SEGermRate [6,10]                          | <b>9.23E-04</b> | 1.03E-03     | 8.59E-04        | 7.57E-04        | 6.97E-04        |
| CVG [12–14]                                | <b>3.25E+00</b> | 3.49E+00     | 3.18E+00        | 2.92E+00        | 2.37E+00        |
| GermRateRecip_Coolbear [2,6,10,15]         | 3.17E-02        | 3.54E-02     | <b>3.52E-02</b> | 3.46E-02        | 3.09E-02        |
| GermRateRecip_Farooq [6,9,10,15]           | 3.17E-02        | 3.57E-02     | <b>3.53E-02</b> | 3.47E-02        | 3.11E-02        |
| GermSpeed_Count                            | <b>2.36E+00</b> | 2.62E+00     | <b>2.36E+00</b> | 2.17E+00        | 1.81E+00        |
| GermSpeedAccumulated_Count [16–19]         | 6.66E+01        | 7.86E+01     | <b>7.19E+00</b> | 3.97E+00        | 2.17E+00        |
| GermSpeedCorrected_Normal [20]             | <b>3.12E-02</b> | 3.37E-02     | 3.04E-02        | 2.79E-02        | 2.33E-02        |
| GermSpeedCorrected_Accumulated             | <b>8.81E-01</b> | 1.01E+00     | 9.24E-02        | 5.11E-02        | 2.79E-02        |
| MeanGermNumber [21]                        | 1.42E+00        | 1.46E+00     | <b>1.46E+00</b> | <b>1.46E+00</b> | <b>1.46E+00</b> |
| TimsonsIndex [22]                          | <b>1.34E+03</b> | 1.54E+03     | 1.75E+03        | 2.00E+03        | 2.32E+03        |
| TimsonsIndex_Labouriau [10]                | <b>1.78E+01</b> | 1.98E+01     | 2.25E+01        | 2.57E+01        | 2.98E+01        |
| TimsonsIndex_KhanUngar [23]                | <b>1.40E+01</b> | 1.60E+01     | 2.19E+02        | 5.00E+02        | 1.16E+03        |
| GermRateGeorge [13,24,25]                  | <b>2.42E+03</b> | 2.77E+03     | 2.63E+02        | 1.50E+02        | 8.70E+01        |
| GermValue_Czabator [4,26]                  | 2.75E+00        | 3.10E+00     | <b>3.10E+00</b> | <b>3.10E+00</b> | 2.63E+00        |
| GermValue_Czabator_mod [26,27]             | 2.75E+00        | 3.10E+00     | <b>3.10E+00</b> | <b>3.10E+00</b> | 2.63E+00        |
| CUGerm [14,28]                             | 1.96E-02        | 2.03E-02     | <b>2.01E-02</b> | 1.83E-02        | 9.44E-03        |
| GermSynchrony [10,29]                      | <b>2.28E-02</b> | 1.61E-02     | 2.42E-01        | 4.71E-01        | 6.27E-01        |

**Supplementary Table S9 Detailed summary of germination indices for *Secale cereale*.** The value with the lowest error compared to the ground truth is shown in bold

|                                            | Predictions     | Ground Truth | M5.5            | M11             |
|--------------------------------------------|-----------------|--------------|-----------------|-----------------|
| Final Germination Percentage g [1]         | 96.67           | 93.33        | <b>93.33</b>    | <b>93.33</b>    |
| Medium Germination Time t50 (Coolbear) [2] | 2.28E+01        | 2.06E+01     | 2.10E+01        | <b>2.08E+01</b> |
| Mean Germination Time MGT [3–6]            | <b>2.34E+01</b> | 2.23E+01     | 2.50E+01        | 2.81E+01        |
| Germination Uncertainty U [6–8]            | 4.55E+00        | 4.89E+00     | 2.25E+00        | 1.36E+00        |
| Medium Germination Time t50 (Farooq) [9]   | 2.26E+01        | 2.05E+01     | 2.08E+01        | <b>2.06E+01</b> |
| VarGermTime [10]                           | 3.43E+01        | 5.03E+01     | <b>5.38E+01</b> | 6.12E+01        |
| SEGermTime [10]                            | 7.75E-01        | 9.47E-01     | <b>9.80E-01</b> | 1.05E+00        |
| CVGermTime [10,11]                         | 2.50E-01        | 3.18E-01     | 2.93E-01        | 2.79E-01        |
| MeanGermRate [8,10]                        | 4.27E-02        | 4.49E-02     | 3.99E-02        | 3.56E-02        |
| VarGermRate [6,10]                         | 1.14E-04        | 2.03E-04     | 1.37E-04        | 9.84E-05        |
| SEGermRate [6,10]                          | 1.41E-03        | 1.91E-03     | 1.56E-03        | 1.33E-03        |
| CVG [12–14]                                | 4.27E+00        | 4.49E+00     | 3.99E+00        | 3.56E+00        |
| GermRateRecip_Coolbear [2,6,10,15]         | 4.40E-02        | 4.85E-02     | 4.76E-02        | 4.81E-02        |
| GermRateRecip_Farooq [6,9,10,15]           | 4.42E-02        | 4.88E-02     | 4.80E-02        | 4.85E-02        |
| GermSpeed_Count                            | 2.96E+00        | 2.75E+00     | 2.42E+00        | 2.13E+00        |
| GermSpeedAccumulated_Count [16–19]         | 7.96E+01        | 8.34E+01     | 8.03E+00        | 4.21E+00        |
| GermSpeedCorrected_Normal [20]             | 3.11E-02        | 2.95E-02     | 2.59E-02        | 2.28E-02        |
| GermSpeedCorrected_Accumulated             | 8.38E-01        | 8.94E-01     | 8.60E-02        | 4.51E-02        |
| MeanGermNumber [21]                        | 1.30E+00        | 1.27E+00     | 1.27E+00        | 1.27E+00        |
| TimsonsIndex [22]                          | 2.00E+03        | 2.07E+03     | 2.28E+03        | 2.51E+03        |
| TimsonsIndex_Labouriau [10]                | 2.11E+01        | 2.22E+01     | 2.45E+01        | 2.69E+01        |
| TimsonsIndex_KhanUngar [23]                | 2.28E+01        | 2.36E+01     | 2.85E+02        | 6.28E+02        |
| GermRateGeorge [13,24,25]                  | 2.40E+03        | 2.49E+03     | 2.49E+02        | 1.37E+02        |
| GermValue_Czabator [4,26]                  | 6.22E+00        | 5.92E+00     | 5.66E+00        | 5.25E+00        |
| GermValue_Czabator_mod [26,27]             | 6.22E+00        | 5.92E+00     | 5.66E+00        | 5.25E+00        |
| CUGerm [14,28]                             | 2.97E-02        | 2.03E-02     | 1.89E-02        | 1.66E-02        |
| GermSynchrony [10,29]                      | 3.76E-02        | 2.01E-02     | 2.21E-01        | 4.24E-01        |

**Supplementary Table S10 Detailed summary of germination indices for *Pennisetum glaucum*.** The value with the lowest error compared to the ground truth is shown in bold

|                                            | Predictions     | Ground Truth | 6h              | 12h             |
|--------------------------------------------|-----------------|--------------|-----------------|-----------------|
| Final Germination Percentage g [1]         | <b>93.33</b>    | 93.33        | <b>93.33</b>    | <b>93.33</b>    |
| Medium Germination Time t50 (Coolbear) [2] | 1.56E+01        | 1.34E+01     | <b>1.50E+01</b> | 1.54E+01        |
| Mean Germination Time MGT [3–6]            | <b>1.62E+01</b> | 1.60E+01     | 1.89E+01        | 2.10E+01        |
| Germination Uncertainty U [6–8]            | <b>4.07E+00</b> | 4.24E+00     | 2.07E+00        | 1.34E+00        |
| Medium Germination Time t50 (Farooq) [9]   | 1.55E+01        | 1.33E+01     | <b>1.47E+01</b> | 1.50E+01        |
| VarGermTime [10]                           | 1.65E+01        | 6.75E+01     | 7.12E+01        | <b>7.07E+01</b> |
| SEGermTime [10]                            | 7.68E-01        | 1.55E+00     | 1.60E+00        | <b>1.59E+00</b> |
| CVGermTime [10,11]                         | 2.51E-01        | 5.13E-01     | <b>4.48E-01</b> | 4.00E-01        |
| MeanGermRate [8,10]                        | <b>6.18E-02</b> | 6.24E-02     | 5.30E-02        | 4.76E-02        |
| VarGermRate [6,10]                         | <b>2.41E-04</b> | 1.02E-03     | 5.63E-04        | 3.63E-04        |
| SEGermRate [6,10]                          | 2.93E-03        | 6.05E-03     | <b>4.49E-03</b> | 3.60E-03        |
| CVG [12–14]                                | <b>6.18E+00</b> | 6.24E+00     | 5.30E+00        | 4.76E+00        |
| GermRateRecip_Coolbear [2,6,10,15]         | 6.40E-02        | 7.48E-02     | <b>6.67E-02</b> | 6.50E-02        |
| GermRateRecip_Farooq [6,9,10,15]           | 6.45E-02        | 7.55E-02     | <b>6.82E-02</b> | 6.67E-02        |
| GermSpeed_Count                            | <b>1.85E+00</b> | 2.11E+00     | 1.76E+00        | 1.55E+00        |
| GermSpeedAccumulated_Count [16–19]         | <b>6.39E+01</b> | 6.84E+01     | 5.98E+00        | 3.25E+00        |
| GermSpeedCorrected_Normal [20]             | <b>1.98E-02</b> | 2.26E-02     | 1.88E-02        | 1.66E-02        |
| GermSpeedCorrected_Accumulated             | <b>6.84E-01</b> | 7.32E-01     | 6.41E-02        | 3.48E-02        |
| MeanGermNumber [21]                        | <b>5.83E-01</b> | 5.83E-01     | <b>5.83E-01</b> | <b>5.83E-01</b> |
| TimsonsIndex [22]                          | <b>3.02E+03</b> | 3.03E+03     | 3.28E+03        | 3.64E+03        |
| TimsonsIndex_Labouriau [10]                | <b>3.23E+01</b> | 3.25E+01     | 3.51E+01        | 3.90E+01        |
| TimsonsIndex_KhanUngar [23]                | <b>3.14E+01</b> | 3.16E+01     | 4.10E+02        | 9.10E+02        |
| GermRateGeorge [13,24,25]                  | <b>1.81E+03</b> | 1.82E+03     | 1.64E+02        | 9.10E+01        |
| GermValue_Czabator [4,26]                  | <b>7.85E+00</b> | 7.60E+00     | 7.02E+00        | 7.02E+00        |
| GermValue_Czabator_mod [26,27]             | <b>7.85E+00</b> | 7.60E+00     | 7.02E+00        | 7.02E+00        |
| CUGerm [14,28]                             | 6.28E-02        | 1.54E-02     | 1.46E-02        | <b>1.47E-02</b> |
| GermSynchrony [10,29]                      | <b>3.44E-02</b> | 2.12E-02     | 2.46E-01        | 4.37E-01        |



**Supplementary Table S11 Selection of germination indices for different timepoints in *Zea mays*.** Predictions and ground-truth are based on 30 minute intervals and best value compared to ground truth is indicated in italic.

|                            | Ground Truth | Predictions | 6h (manual) | 12h (manual) | 24h (manual) |
|----------------------------|--------------|-------------|-------------|--------------|--------------|
| <i>MGT</i> [h]             | 28.7         | <i>30.7</i> | 31.5        | 34.3         | 42.2         |
| <i>U</i> [bit]             | 5.2          | <i>5.0</i>  | 2.3         | 1.3          | 0.8          |
| <i>t</i> <sub>50</sub> [h] | 28.3         | 31.5        | <i>28.4</i> | 28.9         | 32.4         |

## References

1. Association IST. International rules for seed testing. Rules 1985. Seed Sci Technol. 1985;13:299–513.
2. Coolbear P, FRANCIS A, Grierson D. The effect of low temperature pre-sowing treatment on the germination performance and membrane integrity of artificially aged tomato seeds. J Exp Bot. Oxford University Press; 1984;35:1609–1617.
3. Edmond JB, Drapala WJ. The effects of temperature, sand and soil, and acetone on germination of okra seed. Proc Am Soc Hortic Sci. 1958. p. 428–434.
4. Czabator FJ. Germination value: an index combining speed and completeness of pine seed germination. For Sci. Oxford University Press; 1962;8:386–396.
5. Ellis RH, Roberts EH. Improved equations for the prediction of seed longevity. Ann Bot. Oxford University Press; 1980;45:13–30.
6. Labouriau LG. Uma nova linha de pesquisa na fisiologia da germinação das sementes. An XXXIV Congr Nac Botânica SBB Porto Alegre. 1983. p. 11–50.
7. Shannon CE. „A mathematical theory of communication” Bell System Technical Journal, vol. 27. July Oct. 1948;
8. Labouriau LG, Viladares MEB. On the germination of seeds of *Calotropis procera* (Ait.) Ait. f. Anais. 1976;
9. Farooq M, Basra SMA, Ahmad N, Hafeez K. Thermal hardening: a new seed vigor enhancement tool in rice. J Integr Plant Biol. Wiley Online Library; 2005;47:187–193.
10. Ranal MA, Santana DG de. How and why to measure the germination process? Braz J Bot. SciELO Brasil; 2006;29:1–11.
11. Gomes FP. Curso de estatística experimental. Nobel; 1987.
12. Kotowski F. Temperature relations to germination of vegetable seed. 1926.
13. Nichols MA. Two approaches to the study of germination data. Proc Int Seed Test Ass. 1968;33:531–540.
14. Bewley JD, Black M. Seeds: physiology of development and germination. Springer Science & Business Media; 2013.
15. Went FW. The experimental control of plant growth. Exp Control Plant Growth. Chronica Botanica Co., Waltham, Mass., USA & The Ronald Press Co., New York; 1957;17.
16. Bradbeer JW. Seed dormancy and germination. Springer Science & Business Media; 2013.
17. Wardle DA, Ahmed M, Nicholson KS. Allelopathic influence of nodding thistle (*Carduus nutans* L.) seeds on germination and radicle growth of pasture plants. N Z J Agric Res. Taylor & Francis; 1991;34:185–191.
18. Haugland E, Brandsaeter LO. Experiments on bioassay sensitivity in the study of allelopathy. J Chem Ecol. Springer; 1996;22:1845–1859.
19. de Santana DG, Ranal M. Análise da germinação: um enfoque estatístico. UnB; 2004.
20. Evetts LL, Burnside OC. Germination and seedling development of common milkweed

- and other species. *Weed Sci.* Cambridge University Press; 1972;20:371–378.
21. Khamassi K, Harbaoui K, Teixeira da Silva JA, Jeddi FB. Optimal germination temperature assessed by indices and models in Field bean (*Vicia faba* L. var. minor). *Agric Conspec Sci. Agronomski fakultet Zagreb*; 2013;78:131–136.
22. Timson J. New method of recording germination data. *Nature*. Springer; 1965;207:216–217.
23. Khan MA, Ungar IA. The effect of salinity and temperature on the germination of polymorphic seeds and growth of *Atriplex triangularis* Willd. *Am J Bot.* Wiley Online Library; 1984;71:481–489.
24. George DW. Influence of germination temperature on the expression of post-harvest dormancy in wheat. *Crop Sci Abs.* 1961;15.
25. Tucker H, Wright LN. Estimating Rapidity of Germination. *Crop Sci.* Crop Science Society of America; 1965;5:398–399.
26. Brown RF, Mayer DG. Representing cumulative germination. 2. The use of the Weibull function and other empirically derived curves. *Ann Bot.* Oxford University Press; 1988;61:127–138.
27. Djavanshir K, Pourbeik H. Germination value-a new formula. *Silvae Genet.* 1976;25:79–83.
28. Heydecker W. *Seed ecology.* Butterworths; 1973.
29. Primack RB. Longevity of individual flowers. *Annu Rev Ecol Syst.* JSTOR; 1985;15–37.
